# Supplementary material
Source: publisher figshare collection journal article supplement (https://acs.figshare.com/ndownloader/files/3788203)
Supplement: Supplementary file 1 [file 3788203]

## Supporting Information

# Ultrabright Luminescence from Gold Nanoclusters: Rigidifying the Au(I)-Thiolate Shell

*Kyunglim Pyo<sup>a†</sup>, Viraj Dhanushka Thanthirige<sup>b†</sup>, Kyuju Kwak<sup>a</sup>, Prabhu Pandurangan<sup>a</sup>, Guda Ramakrishna<sup>b\*</sup> and Dongil Lee<sup>a\*</sup>*

<sup>a</sup>Department of Chemistry, Yonsei University, Korea

<sup>b</sup>Department of Chemistry, Western Michigan University, Kalamazoo MI 49008, USA

<sup>†</sup> These authors contributed equally to this study.

<sup>\*</sup> E-mail: dongil@yonsei.ac.kr, rama.guda@wmich.edu

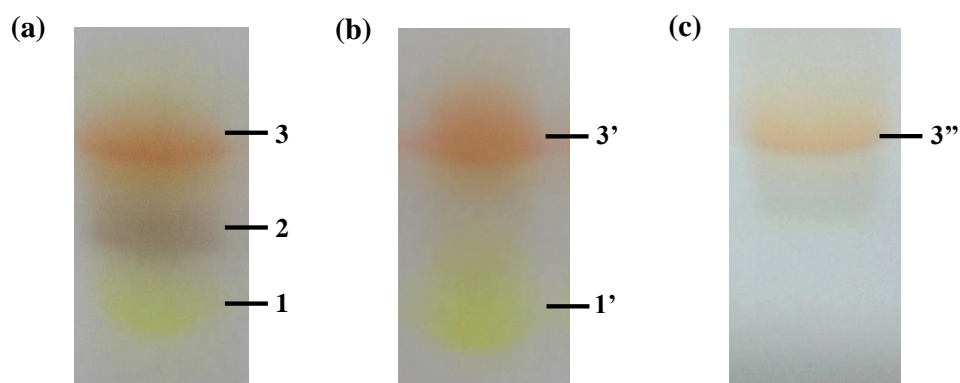

**Figure S1.** PAGE analysis of the reaction product. After (a) 2h- (b) 6h-stirring and (c) separation using water-IPA mixture solvent fractionation. The bands 1 and 1' were identified as  $\text{Au}_{15}(\text{SG})_{13}$ , the band 2 was identified as  $\text{Au}_{18}(\text{SG})_{14}$  and the bands 3, 3', and 3'' were identified as  $\text{Au}_{22}(\text{SG})_{18}$ .

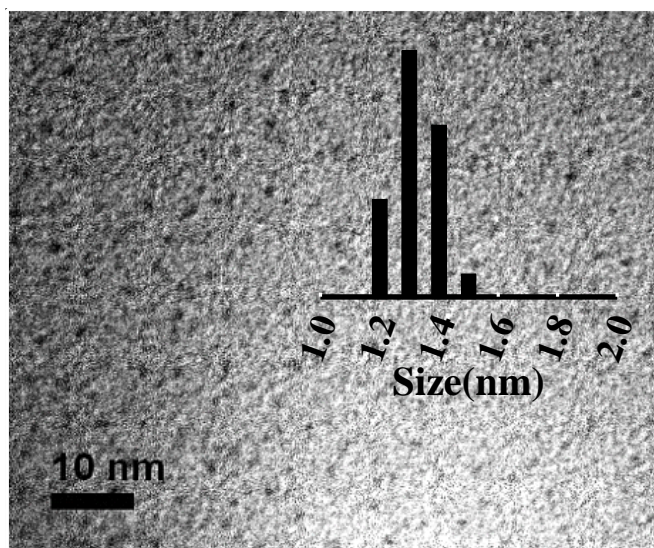

**Figure S2.** TEM image of the isolated  $\text{Au}_{22}(\text{SG})_{18}$ . The average size of the clusters was  $1.3 \pm 0.3$  nm.

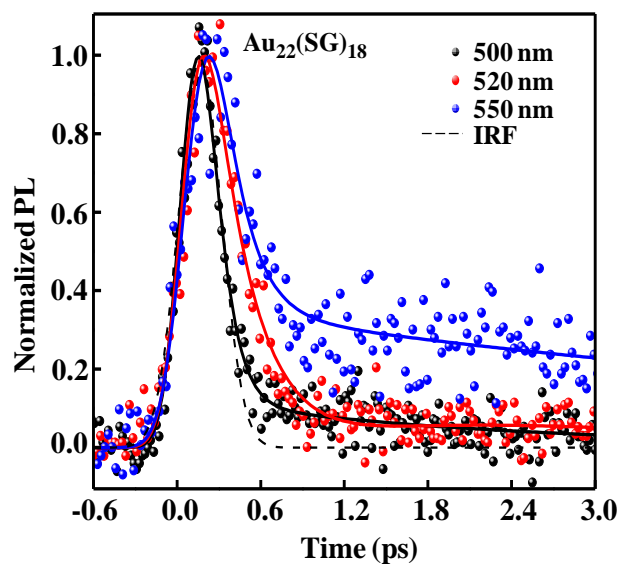

**Figure S3.** Femtosecond luminescence decay traces at visible wavelength regions after excitation at 400 nm. Also, shown in the figure is the instrument response function obtained from Raman scattering of water.

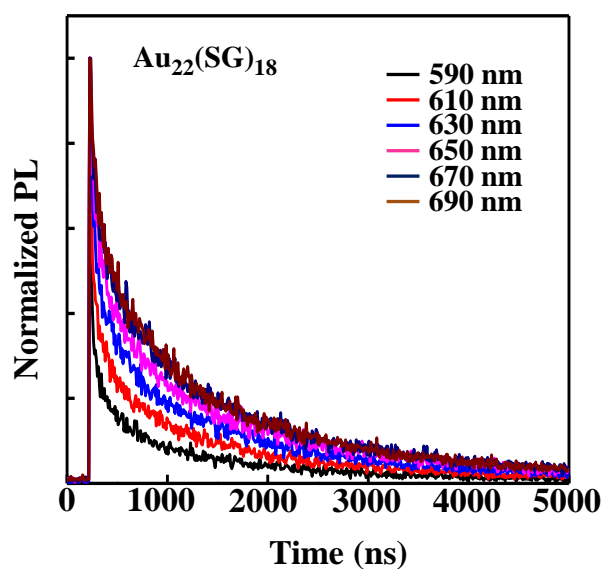

**Figure S4.** Nanosecond time-resolved luminescence decay traces obtained from time-correlated single photon counting technique after excitation at 503 nm.

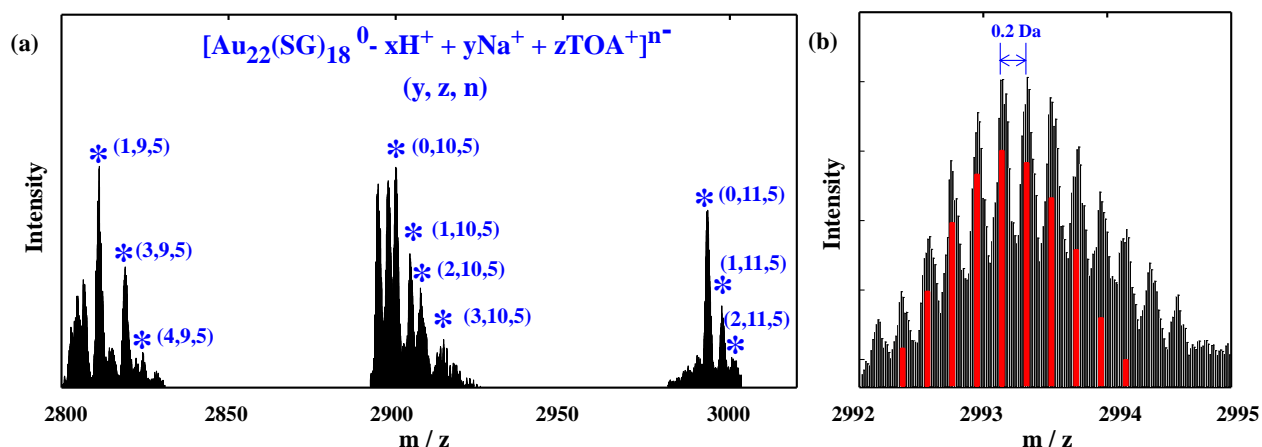

**Figure S5.** (a) Negative-mode ESI mass spectrum of TOA-Au<sub>22</sub>. The assignment coding x, y, z, and n in parenthesis represent, respectively, the number of dissociated H<sup>+</sup>, paired Na<sup>+</sup> and TOA<sup>+</sup> ions, and charge of cluster anions. (x = y + z + n) (b) A comparison between the experimental data (black line) and the calculated isotope pattern (red line) of [Au<sub>22</sub>(SG)<sub>18</sub>]<sup>0</sup> - 16H<sup>+</sup> + 11TOA<sup>+</sup>]<sup>5-</sup>.

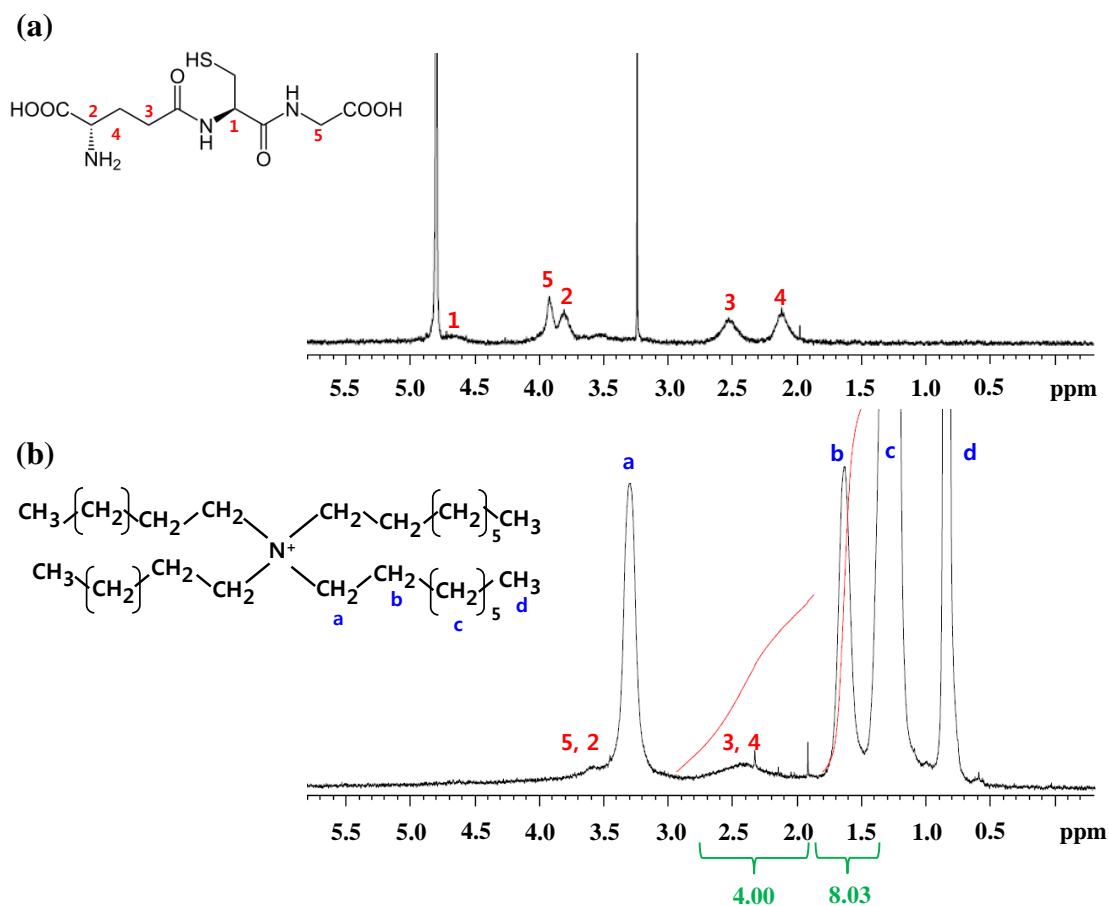

**Figure S6.** <sup>1</sup>H NMR spectra of (a) Au<sub>22</sub>(SG)<sub>18</sub> in D<sub>2</sub>O and (b) TOA-Au<sub>22</sub> in chloroform. For TOA-Au<sub>22</sub>, the number of TOA bound to Au<sub>22</sub>(SG)<sub>18</sub> was determined to be ~18 by comparing the intensity of the <sup>1</sup>H NMR resonance for **3+4** (2.0-2.7 ppm) and **b** (1.5-1.8 ppm).

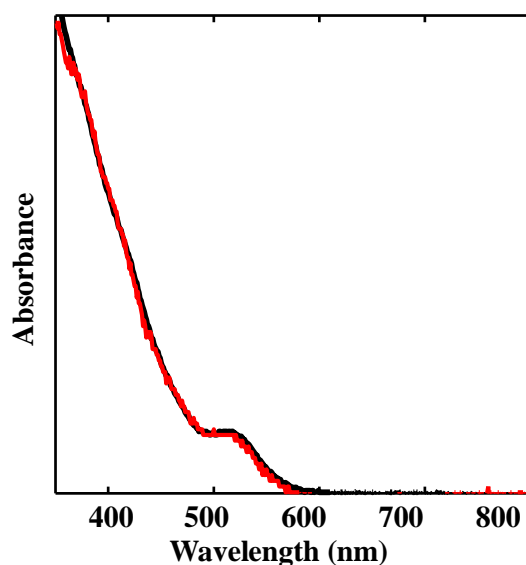

**Figure S7.** UV-vis absorption spectra of  $\text{Au}_{22}(\text{SG})_{18}$  in water (black) and TOA- $\text{Au}_{22}$  in toluene (red). Both solutions were the same  $\text{Au}_{22}(\text{SG})_{18}$  concentration of 1.1 mM.

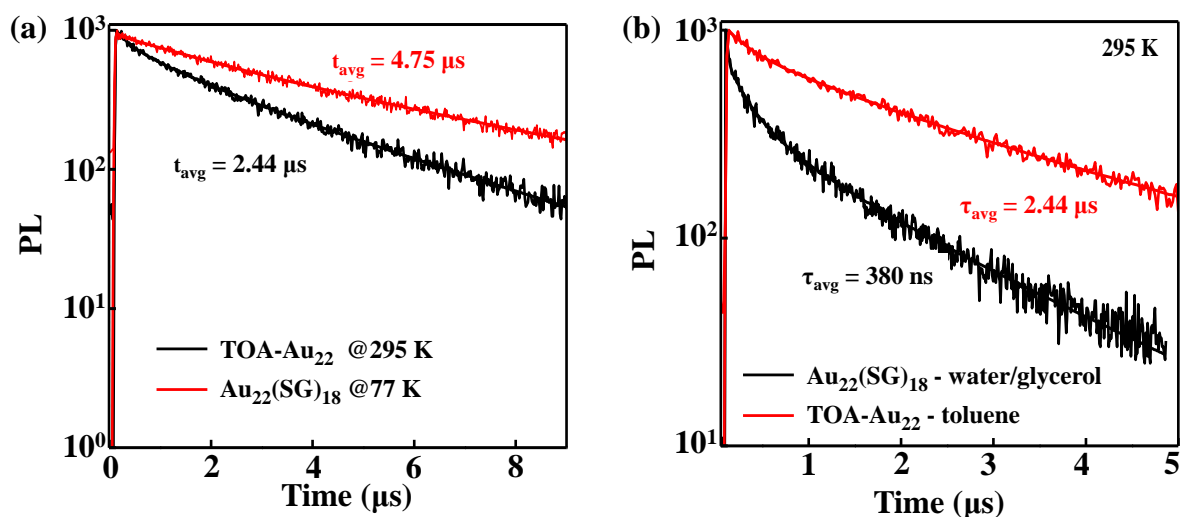

**Figure S8.** Comparison of Luminescence Lifetime of  $\text{Au}_{22}(\text{SG})_{18}$  and TOA- $\text{Au}_{22}$ . (a) Luminescence decay comparison of TOA- $\text{Au}_{22}$  at 295 K with  $\text{Au}_{22}(\text{SG})_{18}$  at 77 K. (b) Comparison of luminescence decay traces of TOA- $\text{Au}_{22}$  and  $\text{Au}_{22}(\text{SG})_{18}$  at 295 K. The differences are obvious with more than 6-fold longer lifetime for TOA- $\text{Au}_{22}$  compared to that of  $\text{Au}_{22}(\text{SG})_{18}$  at 295 K.

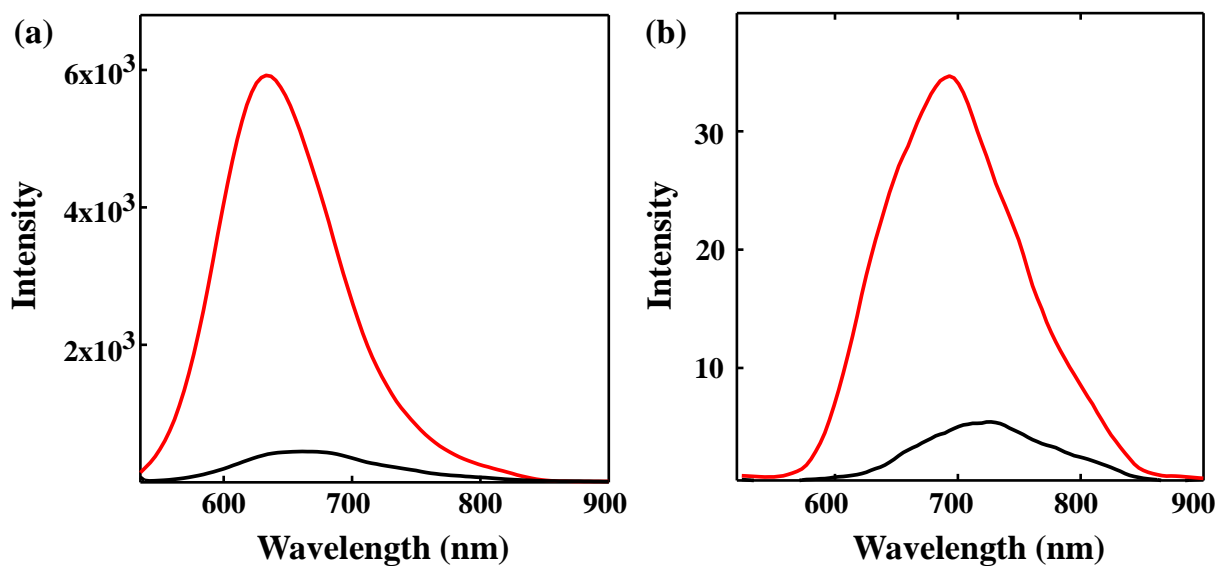

**Figure S9.** Luminescence spectra of (a) Au<sub>22</sub>(SG)<sub>18</sub> (black) and TOA-Au<sub>22</sub> (red) and (b) Au<sub>25</sub>(SG)<sub>18</sub> (black) and TOA-Au<sub>25</sub> (red). All cluster solutions have the same absorbance (0.025) at 514 nm and excited at 514 nm.

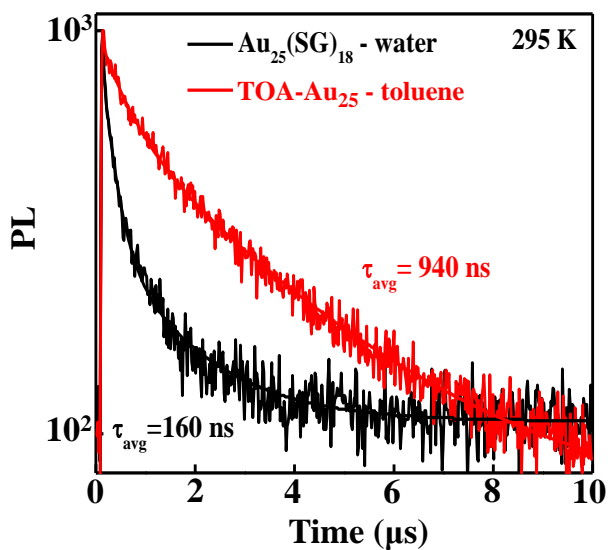

**Figure S10.** Luminescence decay traces of Au<sub>25</sub>(SG)<sub>18</sub> in water and TOA-Au<sub>25</sub> in toluene at 295 K. The decay traces were fitted to three exponential function and average lifetimes were determined.
